# Supplementary material
Source: PubMed Central journal article supplement (PMC5016302)
Supplement: BLT-14-425_supplementary_content.pdf [file BLT-14-425_supplementary_content.pdf]

## Online supplementary content

**Supplementary Table S1** - Website survey of turnaround times for RBC compatibility testing by serological methods.\*

| Medical centre† | Clinical urgency    |                 |
|-----------------|---------------------|-----------------|
|                 | Urgent/STAT (hours) | Routine (hours) |
| 1               | 0.5-1               | 8               |
| 2               | 0.5-1               | 8               |
| 3               | 0.75                | 3-5             |
| 4               | 1                   | -               |
| 5               | 1                   | -               |
| 6               | 1                   | 1               |
| 7               | 1                   | 2               |
| 8               | 1                   | 4               |
| 9               | 1                   | 2               |
| 10              | 1                   | 2               |
| 11              | 1                   | 4               |
| 12              | -                   | 1               |
| 13              | 2                   | 24              |
| 14              | 2                   | 24              |
| Median          | 1                   | 4.5             |

\* Data were obtained by a random search of medical centre websites for turnaround time claims of transfusion services; data correspond to turnaround times for type, screen and cross-match.

† The numbered medical centre websites were as follows (all accessed in December 2014):

- 1) [http://pathology.ucsd.edu/assets/pdf/Blood\\_Bank\\_Manual.pdf](http://pathology.ucsd.edu/assets/pdf/Blood_Bank_Manual.pdf)
- 2) <http://www.lifebridgehealth.org/uploads/public/Documents/lab/LM%205.0.pdf>
- 3) <http://mghlabtest.partners.org/CompatibilityTesting.htm>
- 4) <http://clinlabs.duke.edu/Test.asp>
- 5) <https://online.lexi.com/lco/action/doc/retrieve/docid/ucla/86769>
- 6) [http://www.umc.edu/Administration/Outreach\\_Services/Clinical\\_Laboratory\\_Services/Test\\_List/Crossmatch\\_Blood\\_Products.aspx](http://www.umc.edu/Administration/Outreach_Services/Clinical_Laboratory_Services/Test_List/Crossmatch_Blood_Products.aspx)
- 7) [http://www.mclno.org/webresources/HOSPITAL%20POLICY%205022\\_addendum\\_TAT%20\(4\).pdf](http://www.mclno.org/webresources/HOSPITAL%20POLICY%205022_addendum_TAT%20(4).pdf)
- 8) <http://jdos.nicholsinstitute.com/dos/stlukes/test/18594>
- 9) <http://www.legacyhealth.org/for-health-professionals/refer-a-patient/laboratory-services/blood-bank-transfusion-services/turnaround-time.aspx>
- 10) <http://www.reidhospital.org/index.cfm?pageID=554>
- 11) <http://www.nhrmc.org/documents/Laboratory%20Tests/C%20-%20Tests/Crossmatch.pdf>
- 12) <http://www.evanhospital.com/~media/Files/3Customer%20Manual%20Blood%20Bank%20And%20HIV.pdf>
- 13) <http://search.stjames.ie/sjhservlet/Search.jsp?nlt=crossmatch&dp=Transfusion+Medicine&Search=Search>
- 14) <http://pathology.jhu.edu/departments/divisions/transfusion/specimens.cfm>

STAT: abbreviation of the Latin *statim*, "immediately", often used in medical contexts such as in hospital emergency rooms.
